# Supplementary material for: Species diversity and community structure of crustacean zooplankton in the highland small waterbodies in Northwest Yunnan, China
Source: PeerJ. 2021 Sep 2;9:e12103. doi: 10.7717/peerj.12103 (PMC8418800; doi:10.7717/peerj.12103)
Supplement: Supplemental Information 1 [file peerj-09-12103-s001.xls]

## Sheet: Sheet1
Site	TN(mg/L)	NO3N(mg/L)	NH3N(mg/L)	TP(mg/L)	PO4P(mg/L)	DSi(mg/L)	DOC(mg/L)	Cond（us/cm）	WT(℃)	pH	DO(mg/L)	Chl-a(ug/L)	Season
W-1	0.217	0.053	0.001	0.025	0.011	0.09	13.89	2.8	13.9	8.85	5.5	5.066	rainy
W-3	0.232	0.052	0.023	0.014	0.002	0.046	6.47	3.6	14.7	5.63	4.6	3.9432	rainy
W-4	0.243	0.051	0.023	0.014	0.001	0.042	5.93	3.1	14.8	5.34	5.24	3.286	rainy
W-5	0.355	0.052	0.121	0.02	0.005	0.021	5.04	2.5	15.1	5.48	5.96	3.01	rainy
W-6	0.213	0.05	0.003	0.017	0.003	0.081	16.34	2.7	15.5	5.29	6.27	1.7388	rainy
W-7	0.292	0.056	0	0.027	0.013	0.042	41.46	2.8	15.8	5.37	6.13	2.8184	rainy
W-8	0.28	0.054	0.046	0.034	0.011	0.007	5.99	2.9	15.8	5.57	5.48	3.2076	rainy
W-9	0.247	0.062	0.054	0.021	0.009	0.049	5.23	2.5	15.8	5.62	6.28	2.394	rainy
W-10	0.205	0.055	0.056	0.013	0.003	0.001	4.51	2.6	15.8	5.48	6.28	2.67	rainy
W-11	0.273	0.056	0.002	0.051	0.034	0.04	23.84	2.8	15.8	5.34	6.1	1.5472	rainy
E-U-1	0.191	0.063	0.002	0.036	0.027	0.386	28.62	4.3	15.8	5.42	5.12	1.1928	rainy
E-U-2	0.167	0.08	0.032	0.008	0.006	0.409	3.7	4.3	15.8	5.29	5.52	0.2328	rainy
E-U-3	0.306	0.093	0.07	0.014	0.005	0.367	5.63	3.3	15.8	5.36	5.47	0.6572	rainy
E-U-4	0.22	0.114	0.079	0.003	0.002	0.626	3.93	6.4	15.8	5.57	5.63	0.4716	rainy
E-U-6	0.219	0.184	0.035	0.004	0.003	0.651	2.47	4.2	15.8	5.41	7.61	0.4244	rainy
E-U-7	0.219	0.171	0.045	0.005	0.004	0.387	2.36	2.9	15.8	5.22	8.23	0.4244	rainy
E-U-8	0.184	0.156	0.004	0.01	0.009	0.383	35.51	3	15.8	5.34	8.12	0.4264	rainy
E-U-9	0.24	0.191	0.024	0.008	0.005	0.446	5.28	2.8	15.8	5.38	8.12	0.4264	rainy
E-U-12	0.268	0.206	0.056	0.009	0.005	0.681	2.06	4	15.8	5.7	6.97	0.4244	rainy
E-D-1	0.226	0.058	0.041	0.006	0.002	0.114	4.26	3.3	15.8	5.27	5.79	2.394	rainy
E-D-2	0.193	0.055	0.002	0.011	0.004	0.014	37.73	3.2	15.8	5.21	5.5	1.2752	rainy
E-D-3	0.147	0.057	0.006	0.002	0.001	0.497	11.01	3.2	15.8	5.5	7.33	0.2348	rainy
E-D-4	0.158	0.075	0.056	0.008	0.003	0.503	3	3.1	15.8	5.61	7.16	0.1524	rainy
E-D-5	0.124	0.071	0.021	0.004	0.002	0.458	4.01	3.2	15.8	5.53	7.04	5.9952	rainy
E-D-6	0.104	0.063	0.003	0.007	0.005	0.454	9.38	3.1	15.8	5.66	7.14	0.4224	rainy
E-D-7	0.185	0.062	0.063	0.005	0.002	0.122	4.13	3.3	15.8	5.45	5.71	0.884	rainy
E-D-8	0.156	0.062	0.04	0.008	0.005	0.502	3.1	4.4	15.8	5.47	5.86	0.3872	rainy
E-D-10	0.145	0.058	0.042	0.006	0.003	0.487	3.56	4.3	15.8	5.63	6.43	0.4244	rainy
E-D-11	0.171	0.061	0.062	0.006	0.002	0.489	4.02	4.5	15.8	5.65	6.44	6.1436	rainy
E-D-12	0.154	0.058	0.036	0.005	0.004	0.413	3.69	4.4	15.8	5.73	6.16	0.6592	rainy
E-D-13	0.283	0.061	0.06	0.009	0.003	0.25	6.58	5.6	15.8	5.85	6.02	4.2172	rainy
E-D-14	0.217	0.057	0.056	0.006	0.002	0.558	5.21	7.4	15.8	5.67	5.18	1.0796	rainy
W-1	0.158	0.031	0.036	0.014	0.005	0.123	3.77	32.7	8	6.95	9.11	2.12109	dry
W-2	0.138	0.033	0.039	0.013	0.007	0.136	3.16	3	14.4	7.15	6.53	2.6246	dry
W-4	0.322	0.03	0.035	0.016	0.006	0.152	4.51	4	19.3	5.59	6.36	0.982428	dry
W-7	0.14	0.033	0.049	0.015	0.005	0.134	4.18	3.4	16.8	6.57	5.94	1.63038	dry
W-8	0.309	0.035	0.035	0.024	0.009	0.137	4.32	5.8	16.1	6.11	6.34	7.93003	dry
W-9	0.209	0.039	0.053	0.02	0.008	0.193	4.07	4	18.2	5.89	4.31	1.20288	dry
W-10	0.399	0.071	0.11	0.036	0.019	0.184	4.63	5.3	19.3	6.09	3.4	2.03227	dry
W-11	0.155	0.032	0.044	0.018	0.007	0.129	4.03	9.7	17.2	5.98	5.51	0.774615	dry
E-U-1	0.269	0.023	0.087	0.012	0.005	0.379	4	8.1	11.5	8.72	6.22	0.602326	dry
E-U-2	0.243	0.024	0.08	0.032	0.005	0.403	5.5	4.7	10.7	8.85	6.6	1.21697	dry
E-U-3	0.182	0.025	0.044	0.009	0.004	0.263	3.55	4.4	11.2	8.64	5.76	0.313487	dry
E-U-6	0.181	0.131	0.03	0.009	0.005	0.899	2.49	5.4	14.2	8.07	5.52	0.483025	dry
E-U-7	0.137	0.054	0.043	0.007	0.005	0.643	2.93	5.3	12.6	8.28	7.35	0.286885	dry
E-U-8	0.11	0.065	0.037	0.01	0.005	0.7	2.44	4.3	12.7	8.56	6.83	0.322017	dry
E-U-10	0.204	0.119	0.064	0.012	0.007	0.999	2.42	9.4	11.3	8.57	5.96	0.948684	dry
E-U-11	0.179	0.089	0.061	0.013	0.008	0.918	2.87	6.3	12.7	8.78	6.01	0.867	dry
E-U-12	0.195	0.089	0.062	0.011	0.005	0.884	3.16	5.6	12.9	8.55	6.14	0.323697	dry
E-D-1	0.149	0.028	0.053	0.01	0.004	0.208	3.85	4	10.5	8.76	6.02	0.628007	dry
E-D-3	0.127	0.053	0.06	0.008	0.004	0.742	2.88	5.1	10.8	8.93	5.94	0.276423	dry
E-D-4	0.198	0.027	0.063	0.011	0.004	0.181	3.98	9.1	11.1	8.74	6.36	1.39569	dry
E-D-5	0.151	0.028	0.057	0.009	0.004	0.559	3.17	6.1	10.4	8.79	7.18	1.0165	dry
E-D-6	0.214	0.036	0.08	0.009	0.004	0.672	2.66	5.3	11.8	8.78	6.7	0.315132	dry
E-D-7	0.134	0.026	0.054	0.011	0.004	0.258	3.85	5.4	9.8	8.88	5.84	0.160738	dry
E-D-8	0.123	0.026	0.064	0.009	0.004	0.66	3.84	8.2	9.1	8.67	5.96	0.481345	dry
E-D-9	0.156	0.031	0.039	0.015	0.006	0.867	3.84	7.4	11.4	8.38	6.4	1.97199	dry
E-D-10	0.131	0.026	0.031	0.011	0.005	0.687	3.23	7.4	9.1	8.64	6.77	0.316086	dry
E-D-11	0.142	0.031	0.037	0.011	0.005	0.693	3.4	7.4	8.9	8.67	6.64	0.316256	dry
E-D-12	0.13	0.03	0.041	0.009	0.005	0.744	3.44	7.4	8.3	8.85	7.02	0.532342	dry
E-D-13	0.251	0.024	0.058	0.014	0.005	0.276	4.72	5.6	9.3	8.83	7.23	0.864345	dry
E-D-14	0.205	0.023	0.045	0.011	0.005	0.71	4.05	15.3	8.8	8.53	6.53	1.93016	dry
