# Supplementary material for: Species diversity and community structure of crustacean zooplankton in the highland small waterbodies in Northwest Yunnan, China
Source: PeerJ. 2021 Sep 2;9:e12103. doi: 10.7717/peerj.12103 (PMC8418800; doi:10.7717/peerj.12103)
Supplement: Supplemental Information 2 [file peerj-09-12103-s002.xlsx]

## Sheet: Rainy
Site	Cyclops vicinus	Mesocyclops leuckarti	Alona affinis	Microclops varicaricans	Moina irrasa	Ectocyclops phaleratus	Cyclops strenuuss	Limnoithona sinensis	Nitocra lacustri	Chydorus ovalis	Eucylops serrulatus	Sinodiaptomus sarsi	Bosmina coregoni	Sinocalanus dorrii	Diaphanosoma sp.	Onychocamptus mohammed	Neutrodiaptomus mariadvigae	Alona guttata	Bryocamptus sp.	Tropodiaptomus hebereri
W-1	3	5	0	40	0	4	0	3	0	0	0	6	0	0	0	0	0	0	0	0
W-3	88	21	5	179	5	15	7	18	1	4	2	4	0	0	0	0	0	0	0	0
W-4	0	25	0	0	19	17	15	2	0	5	0	0	0	1	0	0	0	0	0	0
W-5	60	5	22	93	0	46	11	0	0	0	7	0	0	0	0	0	0	0	0	0
W-6	21	24	13	39	0	24	11	5	0	0	0	0	0	0	0	0	2	0	0	0
W-7	89	0	4	175	10	29	9	4	0	7	0	241	0	22	7	0	0	0	0	0
W-8	23	89	0	87	69	61	9	18	0	4	0	71	1	0	15	0	0	0	0	0
W-9	9	41	0	30	0	33	6	1	0	2	2	6	0	2	0	0	0	0	0	0
W-10	25	51	0	168	42	0	0	0	1	0	0	359	0	31	1	0	1	0	0	0
W-11	6	2	2	10	8	6	4	1	0	5	0	3	0	0	0	1	0	0	0	0
E-U-1	37	0	4	74	0	1	0	0	1	0	2	1	1	0	0	0	0	0	0	0
E-U-2	175	0	4	150	0	0	1	0	0	0	6	0	0	3	0	0	0	0	0	0
E-U-3	5	144	0	148	0	3	1	0	2	1	8	0	0	0	1	3	0	3	0	0
E-U-4	0	0	1	0	2	0	1	0	0	1	0	0	1	0	0	0	0	0	0	0
E-U-6	0	0	0	0	0	0	0	1	3	0	1	0	0	0	0	0	0	0	2	2
E-U-7	18	0	0	1	0	1	0	0	2	0	2	0	0	1	0	5	0	5	0	0
E-U-8	0	222	2	0	1	3	0	0	4	0	5	1	2	0	0	3	0	3	0	0
E-U-9	0	11	1	0	0	2	0	0	5	0	0	0	2	0	1	0	0	0	0	0
E-U-12	3	0	0	0	0	0	0	0	1	0	0	0	0	0	0	0	7	0	0	0
E-D-1	68	168	6	310	4	0	0	2	0	3	29	0	0	0	1	0	0	0	0	0
E-D-2	72	36	22	215	10	11	2	16	3	0	24	0	0	0	0	1	0	1	0	0
E-D-3	0	14	2	0	1	0	0	0	3	1	0	1	1	0	1	0	0	0	1	0
E-D-4	4	13	2	116	1	0	2	0	3	0	0	0	0	0	0	0	0	0	0	0
E-D-5	3	139	3	36	0	0	0	0	6	0	0	0	1	0	0	1	1	0	0	0
E-D-6	61	207	0	219	3	23	5	11	0	6	15	0	0	0	0	0	0	0	0	0
E-D-7	360	161	9	384	5	26	0	9	0	5	0	0	0	0	1	1	0	0	0	0
E-D-8	9	0	2	0	2	0	0	0	4	3	0	0	0	0	0	0	0	0	0	0
E-D-10	15	15	4	30	0	0	0	0	0	0	0	5	0	3	0	0	0	0	0	1
E-D-11	0	85	9	0	7	0	13	0	0	0	0	8	0	0	4	0	0	0	0	0
E-D-12	0	167	10	0	5	29	28	11	0	0	0	29	0	0	0	0	1	0	0	0
E-D-13	0	0	0	0	0	0	33	31	0	0	0	0	0	0	0	0	0	0	1	0
E-D-14	29	33	5	0	74	34	58	0	0	0	0	334	0	0	31	0	0	0	0	0

## Sheet: Dry
Site	Chydorus ovalis	Microclops varicaricans	Tropocyclops prasinus	Ceriodaphnia laticaudata	Alonella exigua	Onychocamptus mohammed	Alona karua	Limnoithona sinensis	Graptoleberis testudinaria	Alona rectangula	Moina rectirostris	Ceriodaphnia quadrangula	Alonella globulosa	Tropodiaptomus hebereri	Neutrodiaptomus mariadvigae	Ceriodaphnia reticulata	Cyclops strenuuss	Paracyclops fimbriatus	Sinocalanus dorrii	Bosmina coregoni	Ectocyclops phaleratus	Alona quadrangularis	Chydorus barroisi	Eucylops serrulatus	Diaphanosoma sp.	Alonella sp.	Bryocamptus sp.	Alona sp.	Alona guttata	Alonella nana	Paracyclops affinis	Schmackeria inopinus
W-1	166	231	7	8	4	1	0	6	7	1	2	14	6	0	1	0	1	0	11	0	0	0	0	0	0	0	0	1	0	21	5	1
W-2	5	8	0	2	0	2	0	4	0	1	1	0	0	0	0	0	0	0	0	0	0	0	0	0	0	0	0	0	1	0	0	0
W-4	43	32	0	72	16	2	1	0	5	0	1	0	0	1	1	0	0	0	0	1	1	0	1	0	0	0	0	0	0	0	0	0
W-7	29	28	3	0	19	0	0	14	1	0	1	0	0	8	0	0	1	0	0	0	0	1	0	0	0	0	0	0	0	0	0	1
W-8	38	274	2	14	0	6	2	1	0	1	0	0	0	1	0	0	0	0	0	0	0	1	0	0	0	0	0	0	1	0	0	0
W-9	16	283	6	39	0	2	1	74	0	0	0	14	1	6	6	0	1	0	0	1	0	0	0	0	0	0	0	0	0	0	0	0
W-10	7	75	6	6	0	1	1	27	1	0	6	116	0	13	38	0	0	1	35	0	1	0	1	0	0	0	0	0	0	0	1	0
W-11	5	253	4	5	1	1	0	22	0	1	0	2	0	0	0	0	0	1	0	1	0	0	0	0	0	0	0	0	0	0	0	0
E-U-1	35	141	2	2	0	1	1	0	1	1	0	0	1	0	0	1	1	0	1	1	0	0	0	0	0	0	0	1	0	0	1	0
E-U-2	7	42	1	4	0	0	1	0	0	0	1	0	0	0	1	0	0	1	0	0	0	0	0	3	0	0	0	0	1	0	0	0
E-U-3	9	288	20	2	0	0	1	23	1	0	0	1	0	1	0	0	0	0	1	0	0	0	1	0	0	0	1	1	0	0	0	0
E-U-6	15	7	0	0	0	0	1	0	0	1	0	0	1	0	0	0	0	1	0	0	2	2	1	27	1	0	0	0	0	1	0	0
E-U-7	37	19	1	1	1	1	1	0	1	1	1	1	0	1	1	1	11	0	0	1	0	0	0	0	0	1	0	0	0	0	0	0
E-U-8	45	6	4	0	2	0	0	0	0	1	0	0	1	0	0	0	0	0	0	0	0	1	1	0	1	0	1	0	0	1	0	0
E-U-10	2	1	1	0	4	0	0	2	0	0	1	0	0	0	0	1	1	5	1	1	0	0	0	17	0	0	1	0	0	0	0	0
E-U-11	0	0	0	0	0	1	0	0	0	1	0	0	0	0	1	0	0	0	1	0	1	0	0	0	1	0	1	0	0	0	0	0
E-U-12	153	0	0	0	7	0	1	0	0	0	1	0	0	0	1	0	1	1	1	0	0	1	0	19	0	0	0	0	0	0	0	0
E-D-1	49	49	15	4	46	2	0	1	0	0	0	0	0	0	0	8	0	0	0	0	0	0	0	0	0	0	0	0	0	0	0	0
E-D-3	2	4	0	1	3	0	1	0	0	0	0	0	1	0	0	0	1	1	0	1	0	0	0	1	1	0	0	1	1	0	0	0
E-D-4	114	45	6	0	21	0	0	0	1	0	0	1	0	0	0	13	0	1	1	0	1	0	0	0	0	2	0	0	0	0	1	0
E-D-5	89	11	2	1	23	0	0	1	0	0	0	0	0	1	0	0	0	0	0	0	0	0	0	0	0	1	0	0	0	0	0	0
E-D-6	1	2	2	0	0	0	0	0	1	0	0	0	0	0	1	1	0	0	0	0	0	0	0	0	1	1	1	0	0	0	0	1
E-D-7	11	20	14	43	43	0	0	0	2	0	6	0	3	1	0	3	0	0	0	0	1	0	0	0	1	1	0	1	0	1	1	0
E-D-8	0	0	0	0	0	2	0	2	0	0	0	1	0	0	0	0	0	0	0	7	0	1	15	0	0	0	0	0	0	0	0	0
E-D-9	1	23	8	2	0	0	0	0	1	0	0	0	0	0	0	1	0	0	0	0	0	0	0	0	0	1	0	0	0	0	0	0
E-D-10	7	4	1	1	18	0	0	0	0	1	0	1	1	0	0	0	0	0	0	0	0	0	0	0	0	0	1	1	0	1	0	0
E-D-11	162	178	3	5	0	1	0	0	0	0	0	0	0	1	1	0	1	0	0	0	0	0	0	1	0	0	0	0	1	0	0	0
E-D-12	1	1	0	0	219	0	5	1	0	1	0	1	0	0	0	0	0	0	0	0	0	0	1	0	0	0	0	0	0	1	0	0
E-D-13	58	2	6	16	267	0	0	0	15	1	0	0	6	0	0	1	0	0	0	0	1	2	0	0	0	0	0	0	11	0	0	0
E-D-14	0	0	0	10	7	1	1	0	1	0	1	0	1	0	0	0	0	0	0	0	0	0	0	0	0	0	0	0	0	0	0	0
